# Supplementary material for: Chicory: Understanding the Effects and Effectors of This Functional Food
Source: MDPI journal article supplement (doi:10.3390/nu14050957), 2022-02-23
Supplement: s1 [file s1]

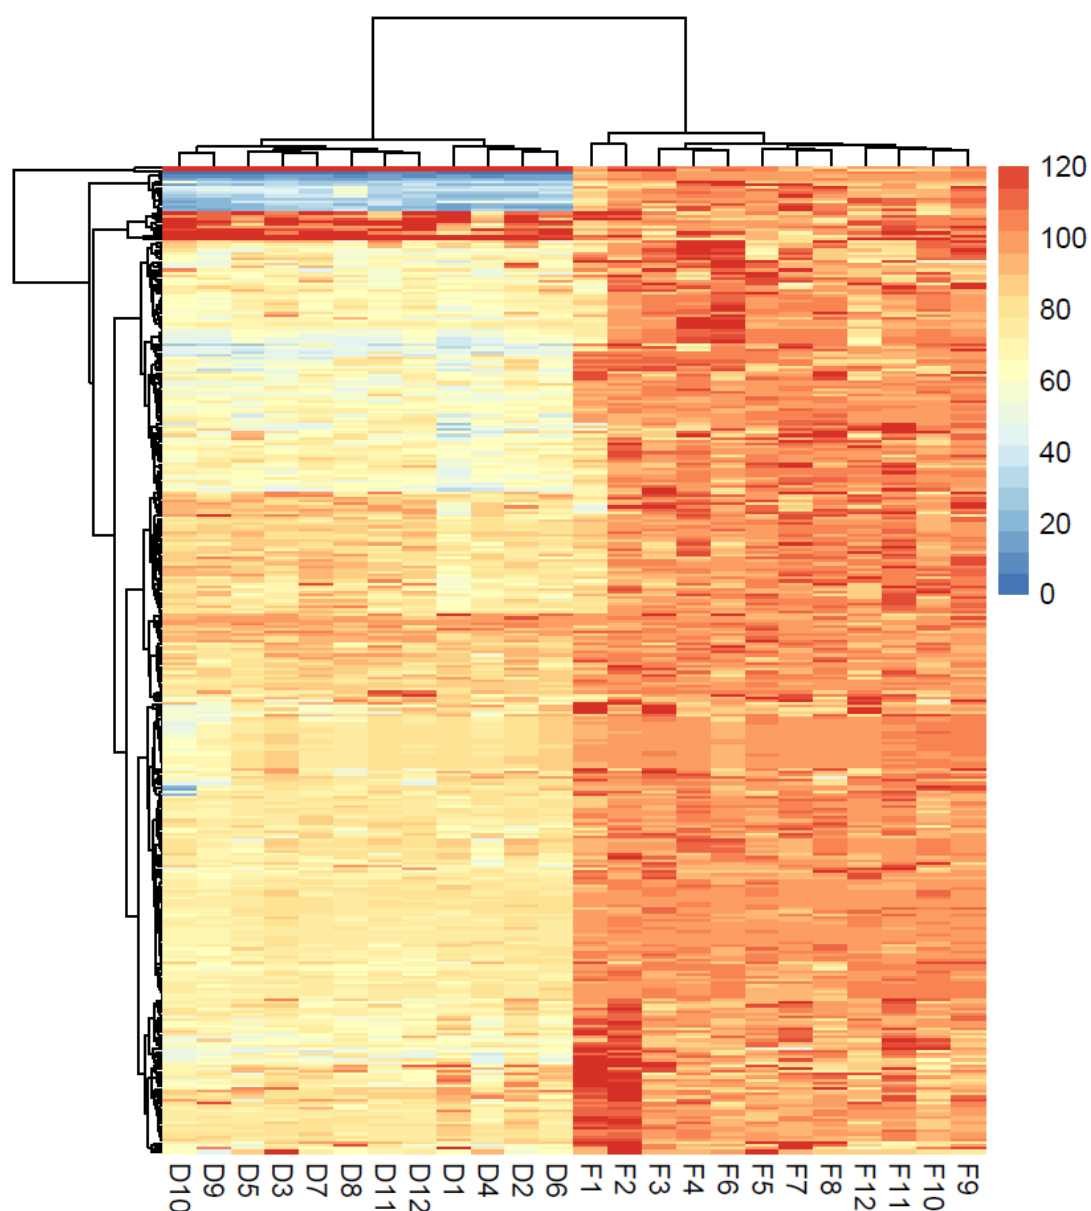

**File S2. Heatmap of metabolite signals.** A number of 161 metabolite signals were generated by  $^1\text{H-NMR}$  and 148 signals by UPLC-HRMS (77 by positive and 71 by negative mode) for twelve replicate (1-12) of chicory flour (F) and decoction (D). Metabolite pick areas were expressed in percentage (100 % correspond at the mean for chicory flour) in the heatmap hierarchical clustering with the Ward's method.
