# Supplementary material for: Chicory: Understanding the Effects and Effectors of This Functional Food
Source: MDPI journal article supplement (doi:10.3390/nu14050957), 2022-02-23
Supplement: s1 [file s1]

**File S1. Mice body weight evolution (A) and standard food consumption (B) during chicory (Chic), fructose (Fru), chlorogenic acids (CGA) and sesquiterpene lactones (STL) supplemented diet for 30 days.**

Body weight (grams) was continuously assessed during diet (n = 5 animals per group D0-D30). Data are expressed as means.

**A**

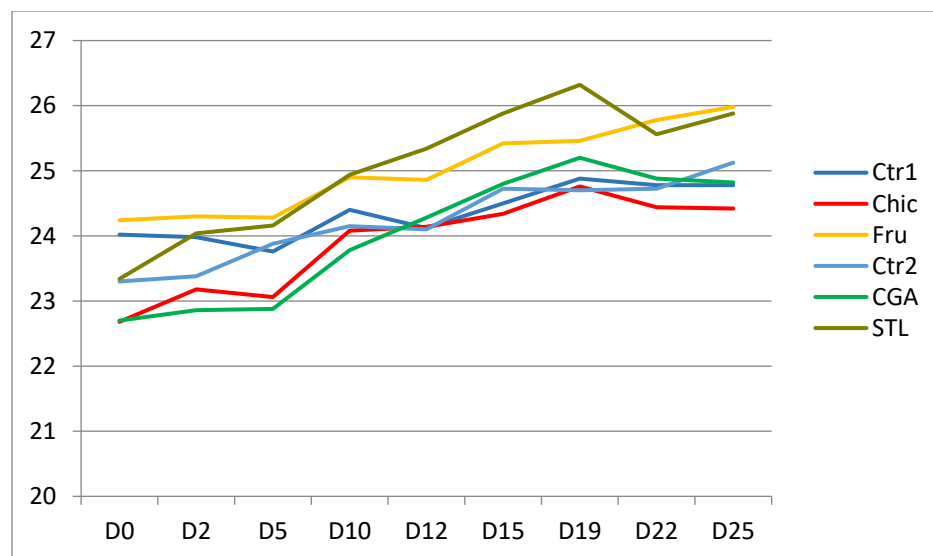

(A) Diet with chicory flour seems to trigger a no significant but sustained decrease of body weight in mice after 10 days of forced feeding. Fructose and STL administrated alone as supplement of diet generate a slight increase of weight in mice after 5-10 days of forced feeding.

**B**

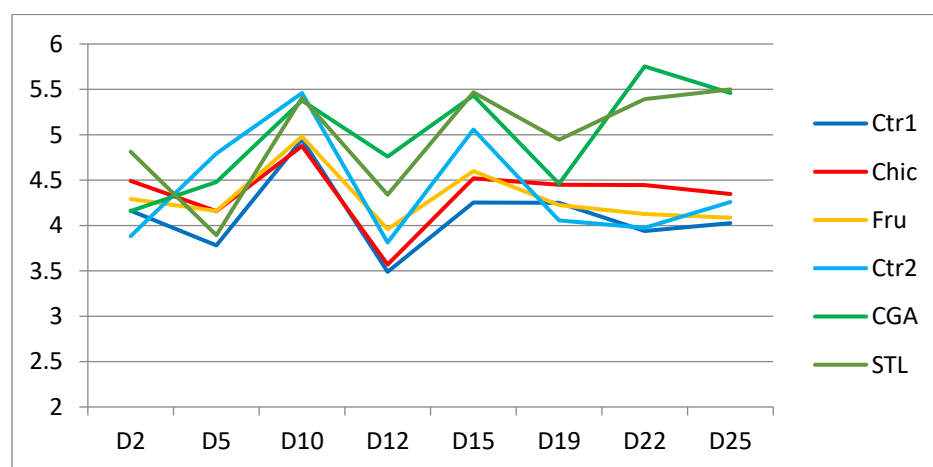

(B) When CGA and STL were administrated alone, mice increased progressively their food consumption. There was no increase observed for chicory or fructose supplemented diets.
