# Supplementary material for: Chicory: Understanding the Effects and Effectors of This Functional Food
Source: MDPI journal article supplement (doi:10.3390/nu14050957), 2022-02-23
Supplement: s1 [file s1]

**File S4. GIP and leptin level in mice plasma, after 30 days of chicory, fructose, CGA and STL diet.**

Statistical analysis was carried out using One-way ANOVA and Sidak's multiple comparisons test. Means  $\pm$  SD were calculated ( $n \geq 3$ ) for each treatment. Mean values of all controls were standardized at 1 value.

| <b>Leptin</b> | <b>n</b> | <b>Control</b> | <b>Chic</b>         | <b>Fru</b>         | <b>CGA</b>          | <b>STL</b>          |
|---------------|----------|----------------|---------------------|--------------------|---------------------|---------------------|
|               |          | 8              | 3                   | 5                  | 3                   | 4                   |
|               |          | 1 $\pm$ 0.1259 | 0.6133 $\pm$ 0.5126 | 0.9323 $\pm$ 0.59  | 0.2716 $\pm$ 0.1083 | 0.5588 $\pm$ 0.4403 |
|               |          | X              | 0.4378              | 0.9953             | 0.0414              | 0.2415              |
| <b>GIP</b>    | <b>n</b> | 8              | 4                   | 5                  | 4                   | 4                   |
|               |          | 1 $\pm$ 0,2492 | 1,15 $\pm$ 0,3461   | 1,614 $\pm$ 0,7258 | 1,26 $\pm$ 0,2095   | 2,416 $\pm$ 1,383   |
|               |          | X              | 0.9903              | 0.3544             | 0.9324              | 0.0086              |
|               |          |                |                     |                    |                     |                     |
